# Supplementary material for: Sex Hormone Receptors in Benign and Malignant Salivary Gland Tumors: Prognostic and Predictive Role
Source: Int J Mol Sci. 2018 Jan 30;19(2):399. doi: 10.3390/ijms19020399 (PMC5855621; doi:10.3390/ijms19020399)
Supplement: Supplementary file 1 [file ijms-19-00399-s001.xlsx]

## Sheet: Foglio1
	Location	SEX	Age	OS	DFS	BENIGN/MALIGNANT	cell type differentiation (epithelial 1, myoepithelial 2, mixed 3)	DIAGNOSI	GRADING	ki 67	ERalpha	Erbeta cytopl	Erbeta nuclear	GPR30 cytopl	GPR30 nuclear	PgR	ANDRO REC
1	Parotid gland sx	1	82			0	2	Myoepithelioma	0	0	0	30	0	1+	0	0	0
3	Submandibular gland	1	48			1	1	Mucoepidermoid ca	1	15	0	0	20	2+	0	0	X
4	Parotid gland dx	1	63			0	3	Pleomorphic adenoma	0	5	0	0	25	0	0	0	0
5	Parotide gland dx	0	51			0	3	Pleomorphic adenoma	0	0	0	0	0	2+	0	0	1+
6	Parotid gland	0	51			1	1	Mucoepidermoid ca	3	10	0	5	0	X	0	0	2+
7	Parotid gland sx	1	24	60		1	1	Mucoepidermoid ca	1	0	0	0	0	2+	0	0	2+
8	Parotid gland	1	17	120	112	1	1	Acinic cell ca	1	5	0	0	7	1+	2+ 5%	0	0
9	Parotid gland sx	0	43			1	1	Mucoepidermoid ca	1	0	0	0	0	2+	0	0	2+
10	Parotid gland	0	40			0	3	Pleomorphic adenoma	0	0	0	NV	0	X	0	0	0
11	Parotid gland	1	68			1	1	Acinic cell ca	1	5	0	0	5	1+	0	0	0
12	Parotid gland	1	73			1	1	Mucoepidermoid ca	3	30	0	0	25	1+	1+N	0	0
13	Submandibular gland	0	71			1	1	Mucoepidermoid ca	3	5	0	0	40	1+	0	0	1+
14	Parotid gland sx	0	73	24		0	1	Warthin tumor	0	30	0	0	5	2+	0	0	0
15	Parotid gland	1	84			0	3	Pleomorphic adenoma	0	0	0	0	0	0	0	0	0
16	Parotid gland	1	28			0	2	Myoepithelioma	0	30	0	0	0	2+ 50%	2+ 5%	0	2+
17	Parotid gland	0	51	24		0	3	Pleomorphic adenoma	0	X	0	0	0	X	0	0	X
18	Lower pole parotid gland	0	76	48		1	3	Mixed tumor	1	5	0	35	0	3+	0	0
19	Parotid gland	1	62	72	61	1	1	Acinic cell ca	1	5	0	0	0	0	0	0	0
20	Parotid gland	0	45			0	2	Myoepithelioma	0	0	0	0	0	1+	0	0	0
21	Parotid gland sx	0	54	48	43	0	3	Pleomorphic adenoma	0	0	0	0	8	X	0	0	X
23	Submandibular gland	1	61	48		1	1	Acinic cell ca	2	0	0	15	0	1+	0	0	0
24	Parotid gland dx	1	36	24	23	0	3	Pleomorphic adenoma	0	0	0	NV	0	X	0	0	2+
25	Parotid gland sx	0	61			1	1	Mucoepidermoid ca	3	40	0	10	0	2+ 10%	0	0	0
26	Parotid gland	1	70			1	2	Myoepithelioma	0	10	0	0	0	0	0	0	0
27	Submandibular gland	1	63			0	1	Oncocitoma	0	0	0	0	0	2+	0	0	0
28	Parotid gland	1	67	24	25	1	1	Acinic cell ca	1	0	0	0	0	0	0	0	0
30	Parotid gland	0	54	50		0	3	Pleomorphic adenoma	0	5	0	0	5	2+	0	0	0
32	Parotid gland sx	0	19	60	51	0	2	Myoepithelioma	0	0	0	0	0	1+	1+ 10%	0	0
33	Parotid gland sx	1	87			1	3	Mixed tumor	2	20	0	10	0	2+	0	0	0
34	Parotid gland sx	0	70	38	38	0	1	Warthin tumor	2	5	0	25	0	2+	0	0	0
35	Parotid gland dx	0	34			0	3	Pleomorphic adenoma	0	10	0	0	0	2+	0	0	0
37	Parotid gland	0	43	48		1	3	Ca ex adenoma pleomorfo	3	X	0	0	15	X	0	0	0
38	Parotid gland sx	0	59	17		1	1	Mucoepidermoid ca	3	10	0	0	25	1+	0	0	0
39	Parotid gland sx	1	35			0	3	Pleomorphic adenoma	0	X	0	NV	0	1+	0	0	3+
40	Parotid gland sx	1	65	60	52	1	1	Mucoepidermoid ca	3	15	0	0	25	2+	0	0	0
41	Submandibular gland	0	69	48	46	0	3	Pleomorphic adenoma	0	5	0	0	5	0	0	0	0
42	Parotid gland	0	77	60		0	2	Myoepithelioma	0	5	0	5	0	2+	2+	0	1+
43	Submandibular gland	0	19			1	1	Mucoepidermoid ca	1	X	0	0	0	2+	0	0	0
44	Submandibular gland	0	78	36		1	1	Mucoepidermoid ca	2	10	0	15	0	2+	0	0	X
45	Parotid gland sx	1	65	26		1	3	Ca ex pleomorphic adenoma	3	X	0	0	0	1+	0	0	2+
46	Parotid gland dx	1	32	72		0	3	Mixed tumor	0	0	0	0	25	2+	2+	0	1+
47	Parotid gland	1	67	60	61	1	1	Mucoepidermoid ca	2	0	0	NV	0	1+	0	0	0
48	Parotid gland	0	76	31		1	3	Ca ex pleomorphic adenoma	3	20	0	0	0	2+	0	0	0
49	Parotid gland	0	37	48		1	1	Acinic cell ca	1	5	0	0	0	0	0	0	0
50	Parotid gland	0	53			0	3	Pleomorphic adenoma	0	0	0	0	0	1+	0	0	0
51	Parotid gland dx	1	79	48		0	3	Pleomorphic adenoma	0	0	0	0	0	1+	0	0	0
52	Parotid gland	0	79	26		1	1	Adenocarcinoma	3	20	0	60	0	1+	1+ 5%	0	0
53	Parotid gland dx	0	84	37		1	1	Oncocytic ca	3	20	0	NV	0	1+	0	0	3+
54	Parotid gland dx	0	57	72	65	1	1	Ductal ca	0	5	0	0	15	2+	0	0	0
55	Parotid gland dx	1	57	72	68	0	2	Myoepithelioma	0	5	0	25	0	3+	3+	0	0
56	Parotid gland	1	50			0	3	Pleomorphic adenoma	0	X	0	NV	0	1+	0	0	X
57	Parotid gland dx	0	77	72		1	1	Acinic cell ca	1	10	0	0	25	3+	0	0	0
58	Parotid gland	0	24	48		0	3	Pleomorphic adenoma	0	5	0	NV	0	1+	1+ 5%	0	0
59	Parotid gland sx	1	31	48	48	0	3	Pleomorphic adenoma	0	0	0	NV	0	2+ 20%	0	0	2+
61	Parotid gland sx	1	33	72		1	1	Mucoepidermoid ca	2	10	0	0	30	2+	3+	0	0
62	Parotid gland dx	0	17			0	3	Pleomorphic adenoma	0	5	0	0	30	2+ 60%	0	0	2+
63	Submandibular gland	0	54	48		1	1	Adenoid cystic ca		10	0	0	10	3+30%	0	0	0
64	Parotid gland sx	1	51			1	1	Acinic cell ca	1	0	0	10	0	3+30%	0	0	0
65	Parotid gland dx	0	14			0	3	Pleomorphic adenoma	0	5	0	0	0	0	0	0	0
66	Parotid gland	1	59			1	1	Acinic cell ca	2	0	0	7	0	0	0	0	0
67	Parotid gland sx	0	78	36	36	1	1	Adenocarcinoma	3	5	0	50	0	2+10%	0	0	0
68	Parotid gland dx	0	71			0	1	Basal cell adenoma	0	0	0	NV	0	1+	0	0	X
69	Lower pole parotid parasternal	0	58			0		Warthin tumor	0	0	0	5	0	3+	0	0	0
70	Parotid gland sx	0	54			0	1	Warthin tumor	0	0	0	0	5	2+	0	0	0
71	Parotid gland sx	0	58			0	1	Warthin tumor	0	0	0	0	40	3+	3+	0	0
72	Parotid gland sx	0	54			0	1	Warthin tumor	0	10	0	15	0	2+	0	0	0
73	Parotid gland sx	0	54			0	1	Warthin tumor	0	X	0	NV	0	2+	0	0	0
74	Parotid gland sx	0	69			0	1	Warthin tumor	0	0	0	NV	0	2+	0	0
75	Parotid gland dx	0	71			0	1	Warthin tumor	0	10	0	75	0	X	0	0	1+
